# Supplementary figures and images for: Crystal structures and investigation of the third-order nonlinear optical properties of four coordination polymers by using the Z-scan technique
Source: Royal Society of Chemistry journal article supplement (doi:10.1039/c8ce01283k), 2018-01-01

**(A)**

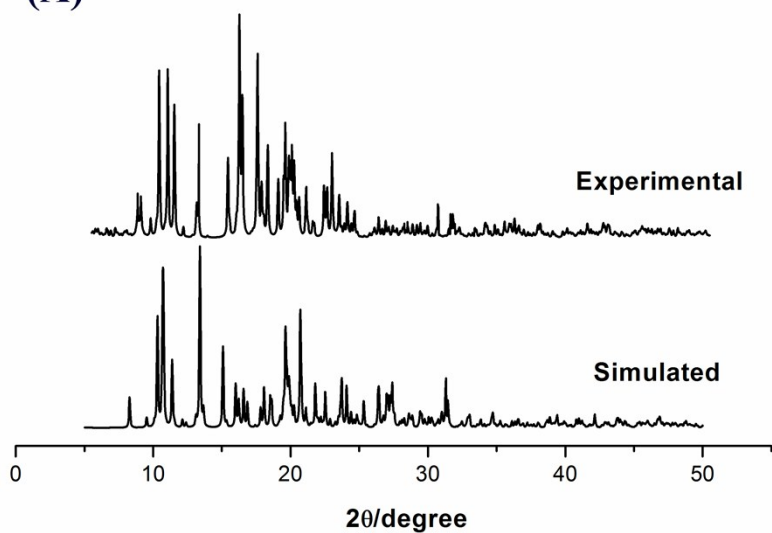

**(B)**

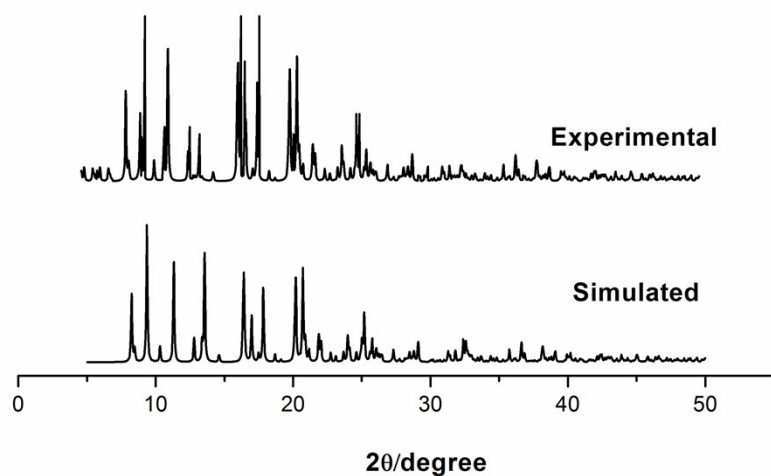

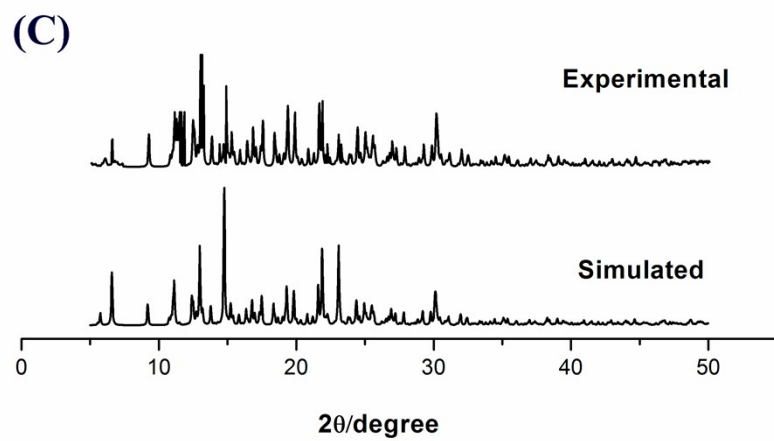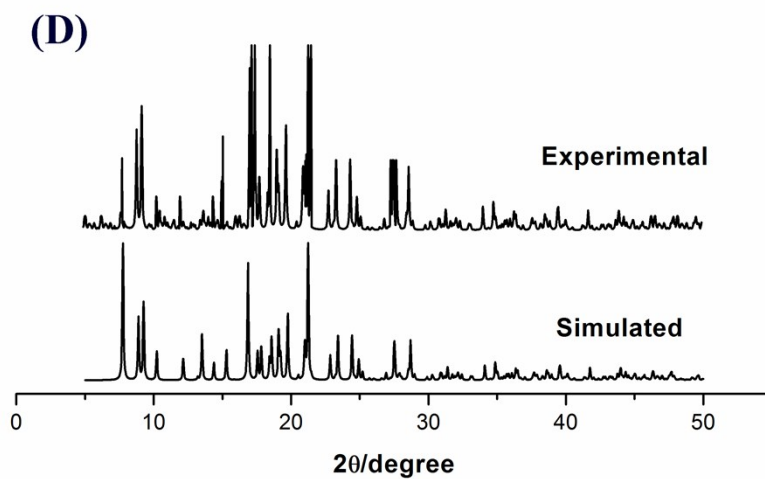

Fig. S1. The PXR D patterns of the 1 (A), 2 (B) , 3(C) and 4(D)

Supplement: c8ce01283k1.pdf [file c8ce01283k1.pdf]
